# Supplementary material for: Silica aerogel-supported cobalt nanocomposites as efficient catalysts toward hydrogen generation from aqueous ammonia borane
Source: Royal Society of Chemistry journal article supplement (doi:10.1039/c4ra14002h), 2015-01-01
Supplement: c4ra14002h1.pdf [file c4ra14002h1.pdf]

**Electronic Supplementary Information:**

**Silica aerogel-supported cobalt nanocomposites as efficient catalysts toward hydrogen generation from aqueous ammonia borane**

*Pin-Ju Yu, Yui Whei Chen-Yang\**

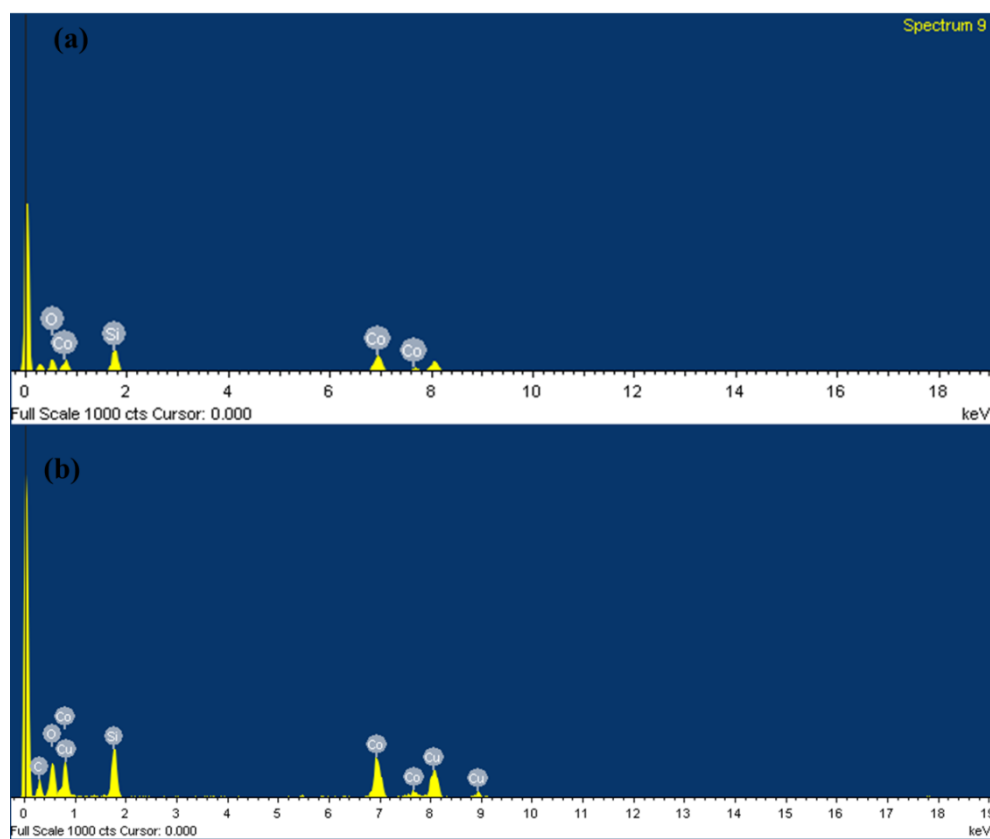

Fig. S1 EDX of (a) Co/SAG and (b) Co/MCM-41.

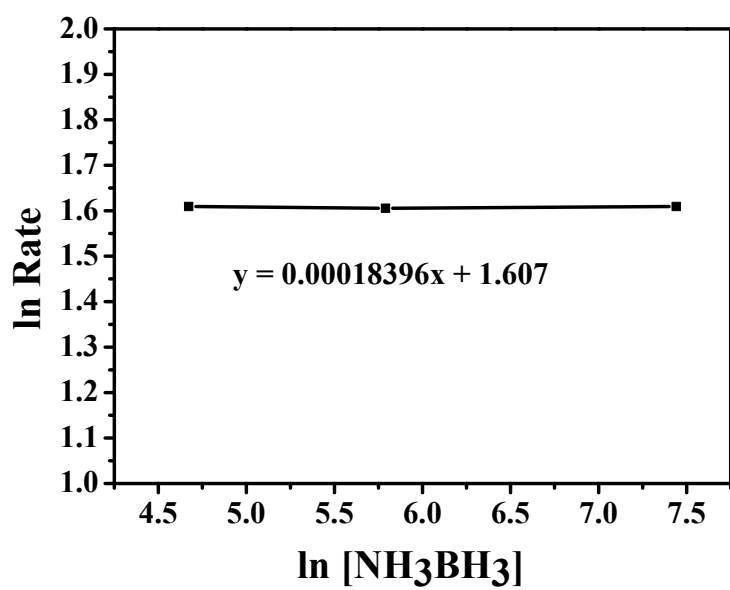

Fig. S2 The plot of hydrogen generation rate versus the concentration of AB.
